# Supplementary material for: Complexation of biologically essential (mono- and divalent) metal cations to cucurbiturils: a DFT/SMD evaluation of the key factors governing the host–guest recognition
Source: Royal Society of Chemistry journal article supplement (doi:10.1039/d0ra04387g), 2020-01-01
Supplement: d0ra04387g1.pdf [file d0ra04387g1.pdf]

## Supplementary material

### Complexation of biologically essential (mono- and divalent) metal cations to cucurbiturils: A DFT/SMD evaluation of the key factors governing the host-guest recognition

Nikoleta Kircheva,<sup>a</sup> Stefan Dobrev,<sup>a</sup> Lyubima Dasheva,<sup>b</sup> Iskra Koleva,<sup>b</sup>  
Valya Nikolova,<sup>b</sup> Silvia Angelova<sup>a\*</sup> and Todor Dudev<sup>b\*</sup>

<sup>a</sup> Institute of Optical Materials and Technologies “Acad. J. Malinowski”, Bulgarian Academy of Sciences, 1113 Sofia, Bulgaria

<sup>b</sup> Faculty of Chemistry and Pharmacy, Sofia University “St. Kl. Ohridski”, 1164 Sofia, Bulgaria

**Table S1.** BSSE-corrected Gibbs energies for the complex formation in the gas phase (superscript 1), and in a water environment (superscript 78), for the CB[n], n=5-8, complex formation with bare Mg<sup>2+</sup> cations, in kcal mol<sup>-1</sup>.

| Reaction                                            | $\Delta G^1$ | $\Delta G^{78}$ |
|-----------------------------------------------------|--------------|-----------------|
| <i>M062X/6-31G(d,p)</i>                             |              |                 |
| CB[5] + Mg <sup>2+</sup> → CB[5]-Mg <sup>1 2+</sup> | -322.5       | -56.7           |
| CB[6] + Mg <sup>2+</sup> → CB[6]-Mg <sup>1 2+</sup> | -299.0       | -48.4           |
| CB[7] + Mg <sup>2+</sup> → CB[7]-Mg <sup>1 2+</sup> | -291.1       | -42.5           |
| CB[8] + Mg <sup>2+</sup> → CB[8]-Mg <sup>1 2+</sup> | -285.8       | -40.2           |

**Table S2.** BSSE-corrected Gibbs energies for the complex formation in the gas phase (superscript 1), and in a water environment (superscript 78), for the CB[7]<sup>m+</sup> (M = Na, K, Mg, Ca; m = 1,2) complex formation, in kcal mol<sup>-1</sup>.

| Reaction                                            | $\Delta G^1$ | $\Delta G^{78}$ |
|-----------------------------------------------------|--------------|-----------------|
| <i>M062X/6-31G(d,p)</i>                             |              |                 |
| CB[7] + Na <sup>+</sup> → CB[7]-Na <sup>1 +</sup>   | -77.7        | -21.9           |
| CB[7] + K <sup>+</sup> → CB[7]-K <sup>1 +</sup>     | -63.3        | -16.4           |
| CB[7] + Mg <sup>2+</sup> → CB[7]-Mg <sup>1 2+</sup> | -291.1       | -42.5           |
| CB[7] + Ca <sup>2+</sup> → CB[7]-Ca <sup>1 2+</sup> | -219.1       | 6.4             |

**Table S3.** BSSE-corrected Gibbs energies for the complex formation in the gas phase (superscript 1), and in a water environment (superscript 78), for the CB[7]-2Mg<sup>1 4+</sup> complex formation in different positions of the second Mg<sup>2+</sup>, in kcal mol<sup>-1</sup>.

| Reaction                                                                | $\Delta G^1$ | $\Delta G^{78}$ |
|-------------------------------------------------------------------------|--------------|-----------------|
| <b>M062X/6-31G(d,p)</b>                                                 |              |                 |
| $CB[7] + Mg^{2+} \rightarrow CB[7]-Mg\gamma^{2+}$                       | -291.1       | -42.5           |
| $CB[7]-Mg\gamma^{2+} + Mg^{2+} \rightarrow CB[7]-2*Mg\gamma^{4+} (1;2)$ | -123.9       | -37.3           |
| $CB[7]-Mg\gamma^{2+} + Mg^{2+} \rightarrow CB[7]-2*Mg\gamma^{4+} (1;3)$ | -68.5        | -36.4           |
| $CB[7]-Mg\gamma^{2+} + Mg^{2+} \rightarrow CB[7]-2*Mg\gamma^{4+} (1;4)$ | -131.4       | -45.7           |

**Table S4.** BSSE-corrected Gibbs energies for the complex formation in the gas phase (superscript 1), and in a water environment (superscript 78), for the  $CB[7]-Na(H_2O)_6\gamma^{1+}$ ,  $CB[7]-K(H_2O)_6\gamma^{1+}$ ,  $CB[7]-Mg(H_2O)_6\gamma^{2+}$ ,  $CB[7]-Ca(H_2O)_8\gamma^{2+}$  and  $CB[7]-2*Mg(H_2O)_6\gamma^{4+}$  complexes, in kcal mol<sup>-1</sup>.

| Reaction                                                                                        | $\Delta G^1$ | $\Delta G^{78}$ |
|-------------------------------------------------------------------------------------------------|--------------|-----------------|
| <b>M062X/6-31G(d,p)</b>                                                                         |              |                 |
| $CB[7] + Na(H_2O)_6\gamma^{1+} \rightarrow CB[7]-Na(H_2O)_6\gamma^{1+}$                         | -58.9        | -22.2           |
| $CB[7] + K(H_2O)_6\gamma^{1+} \rightarrow CB[7]-K(H_2O)_6\gamma^{1+}$                           | -46.7        | -13.5           |
| $CB[7] + Mg(H_2O)_6\gamma^{2+} \rightarrow CB[7]-Mg(H_2O)_6\gamma^{2+}$                         | -135.5       | -28.0           |
| $CB[7] + Ca(H_2O)_8\gamma^{2+} \rightarrow CB[7]-Ca(H_2O)_8\gamma^{2+}$                         | -121.1       | -22.1           |
| $CB[7]-Mg(H_2O)_6\gamma^{2+} + Mg(H_2O)_6\gamma^{2+} \rightarrow CB[7]-2*Mg(H_2O)_6\gamma^{4+}$ | 20.4         | -19.7           |

**Table S5.** Number of  $CB[n]O-Mg$  bonds and mean  $CB[n]O-Mg$  distances (Å).

| Complex               | M062X/6-31G(d,p) |              | B3LYP-D3/6-31G(d,p) |              |
|-----------------------|------------------|--------------|---------------------|--------------|
|                       | Bonds            | Distance (Å) | Bonds               | Distance (Å) |
| $CB[5]-Mg\gamma^{2+}$ | 4                | 2.03         | 4                   | 2.05         |
| $CB[6]-Mg\gamma^{2+}$ | 3                | 1.94         | 3                   | 1.94         |
| $CB[7]-Mg\gamma^{2+}$ | 3                | 1.93         | 3                   | 1.94         |
| $CB[8]-Mg\gamma^{2+}$ | 3                | 1.93         | 3                   | 1.94         |

**Table S6.** BSSE-corrected Gibbs energies for the complex formation in the gas phase (superscript 1), and in a water environment (superscript 78), for the  $CB[n]$ ,  $n=5-8$ , complex formation with bare  $Mg^{2+}$  cations, in kcal mol<sup>-1</sup>.

| Reaction                                          | $\Delta G^1$               | $\Delta G^{78}$         | $\Delta G^1$                                     | $\Delta G^{78}$                            |
|---------------------------------------------------|----------------------------|-------------------------|--------------------------------------------------|--------------------------------------------|
|                                                   |                            | <b>M062X/6-31G(d,p)</b> |                                                  | <b>M062X/6-31+G(d,p)//M062X/6-31G(d,p)</b> |
| $CB[5] + Mg^{2+} \rightarrow CB[5]-Mg\gamma^{2+}$ | -322.5                     | -56.7                   | -315.6                                           | -48.2                                      |
| $CB[6] + Mg^{2+} \rightarrow CB[6]-Mg\gamma^{2+}$ | -299.0                     | -48.4                   | -293.7                                           | -41.7                                      |
| $CB[7] + Mg^{2+} \rightarrow CB[7]-Mg\gamma^{2+}$ | -291.1                     | -42.5                   | -285.8                                           | -36.2                                      |
| $CB[8] + Mg^{2+} \rightarrow CB[8]-Mg\gamma^{2+}$ | -285.8                     | -40.2                   | -280.9                                           | -33.9                                      |
|                                                   | <b>B3LYP-D3/6-31G(d,p)</b> |                         | <b>B3LYP-D3/6-31+G(d,p)//B3LYP-D3/6-31G(d,p)</b> |                                            |
| $CB[5] + Mg^{2+} \rightarrow CB[5]-Mg\gamma^{2+}$ | -327.5                     | -64.2                   | -317.4                                           | -52.7                                      |
| $CB[6] + Mg^{2+} \rightarrow CB[6]-Mg\gamma^{2+}$ | -303.4                     | -53.2                   | -295.6                                           | -44.4                                      |
| $CB[7] + Mg^{2+} \rightarrow CB[7]-Mg\gamma^{2+}$ | -296.6                     | -49.0                   | -288.8                                           | -40.5                                      |

|                                                                          |        |       |        |       |
|--------------------------------------------------------------------------|--------|-------|--------|-------|
| $\text{CB}[8] + \text{Mg}^{2+} \rightarrow \text{CB}[8]-\text{Mg}^{12+}$ | -293.3 | -47.0 | -285.2 | -38.5 |
|--------------------------------------------------------------------------|--------|-------|--------|-------|

**Table S7.** BSSE-corrected Gibbs energies calculated for the  $\text{CB}[5]-\text{Mg}^{12+}$  complex formation in the gas phase (superscript 1), and in a water environment (superscript 78) at different ambient conditions.

| Conditions         | M062X/6-31G(d,p) |                 | M062X/6-31+G(d,p)//<br>M062X/6-31G(d,p) |                 |
|--------------------|------------------|-----------------|-----------------------------------------|-----------------|
|                    | $\Delta G^1$     | $\Delta G^{78}$ | $\Delta G^1$                            | $\Delta G^{78}$ |
| 298.15 K; 1.0 atm  | -322.5           | -56.7           | -315.6                                  | -48.2           |
| 373.15 K; 1.0 atm  | -320.5           | -55.5           | -313.7                                  | -47.1           |
| 373.15 K; 10.0 atm | -318.8           | -53.8           | -312.1                                  | -45.5           |

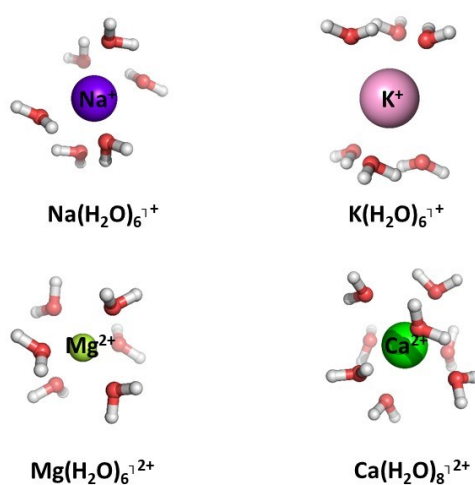

**Figure S1.** Optimized geometries of aqua ions of the studied mono- and divalent metals.
